# Supplementary material
Source: publisher figshare collection journal article supplement (https://acs.figshare.com/ndownloader/files/4477513)
Supplement: Supplementary file 1 [file 4477513]

  
data_en_iv_91c 
  
_audit_creation_method            SHELXL-97 
_chemical_name_systematic 
; 
 ? 
; 
_chemical_name_common             ? 
_chemical_melting_point           ? 
_chemical_formula_moiety 
 'C23 H28 O5' 
_chemical_formula_sum 
 'C23 H28 O5' 
_chemical_formula_weight          384.45 
  
loop_ 
 _atom_type_symbol 
 _atom_type_description 
 _atom_type_scat_dispersion_real 
 _atom_type_scat_dispersion_imag 
 _atom_type_scat_source 
 'C'  'C'   0.0181   0.0091 
 'International Tables Vol C Tables 4.2.6.8 and 6.1.1.4' 
 'H'  'H'   0.0000   0.0000 
 'International Tables Vol C Tables 4.2.6.8 and 6.1.1.4' 
 'O'  'O'   0.0492   0.0322 
 'International Tables Vol C Tables 4.2.6.8 and 6.1.1.4' 
  
_symmetry_cell_setting            Monoclinic 
_symmetry_space_group_name_H-M    C2/c 
  
loop_ 
 _symmetry_equiv_pos_as_xyz 
 'x, y, z' 
 '-x, y, -z+1/2' 
 'x+1/2, y+1/2, z' 
 '-x+1/2, y+1/2, -z+1/2' 
 '-x, -y, -z' 
 'x, -y, z-1/2' 
 '-x+1/2, -y+1/2, -z' 
 'x+1/2, -y+1/2, z-1/2' 
  
_cell_length_a                    26.0068(13) 
_cell_length_b                    9.6177(5) 
_cell_length_c                    19.2164(10) 
_cell_angle_alpha                 90.00 
_cell_angle_beta                  122.693(3) 
_cell_angle_gamma                 90.00 
_cell_volume                      4045.0(4) 
_cell_formula_units_Z             8 
_cell_measurement_temperature     173(2) 
_cell_measurement_reflns_used     3584 
_cell_measurement_theta_min       4.04 
_cell_measurement_theta_max       65.50 
  
_exptl_crystal_description        plate 
_exptl_crystal_colour             colourless 
_exptl_crystal_size_max           0.31 
_exptl_crystal_size_mid           0.26 
_exptl_crystal_size_min           0.14 
_exptl_crystal_density_meas       ? 
_exptl_crystal_density_diffrn     1.263 
_exptl_crystal_density_method     'not measured' 
_exptl_crystal_F_000              1648 
_exptl_absorpt_coefficient_mu     0.713 
_exptl_absorpt_correction_type    multi-scan 
_exptl_absorpt_correction_T_min   0.8092 
_exptl_absorpt_correction_T_max   0.9067 
_exptl_absorpt_process_details    SADABS 
  
_exptl_special_details 
; 
 ? 
; 
  
_diffrn_ambient_temperature       173(2) 
_diffrn_radiation_wavelength      1.54178 
_diffrn_radiation_type            CuK\a 
_diffrn_radiation_source          'fine-focus sealed tube' 
_diffrn_radiation_monochromator   graphite 
_diffrn_measurement_device_type   'Bruker APEX-II CCD' 
_diffrn_measurement_method        '\f and \w scans' 
_diffrn_detector_area_resol_mean  ? 
_diffrn_standards_number          0 
_diffrn_standards_interval_count  ? 
_diffrn_standards_interval_time   ? 
_diffrn_standards_decay_%         ? 
_diffrn_reflns_number             11870 
_diffrn_reflns_av_R_equivalents   0.0559 
_diffrn_reflns_av_sigmaI/netI     0.0499 
_diffrn_reflns_limit_h_min        -29 
_diffrn_reflns_limit_h_max        30 
_diffrn_reflns_limit_k_min        -8 
_diffrn_reflns_limit_k_max        11 
_diffrn_reflns_limit_l_min        -22 
_diffrn_reflns_limit_l_max        22 
_diffrn_reflns_theta_min          4.04 
_diffrn_reflns_theta_max          65.90 
_reflns_number_total              3193 
_reflns_number_gt                 2382 
_reflns_threshold_expression      >2sigma(I) 
  
_computing_data_collection        'Bruker APEX2' 
_computing_cell_refinement        'Bruker SAINT' 
_computing_data_reduction         'Bruker SAINT' 
_computing_structure_solution     'SHELXS-97 (Sheldrick, 1990)' 
_computing_structure_refinement   'SHELXL-97 (Sheldrick, 1997)' 
_computing_molecular_graphics     'Bruker SHELXTL' 
_computing_publication_material   'Bruker SHELXTL' 
  
_refine_special_details 
; 
 Refinement of F^2^ against ALL reflections.  The weighted R-factor wR and 
 goodness of fit S are based on F^2^, conventional R-factors R are based 
 on F, with F set to zero for negative F^2^. The threshold expression of 
 F^2^ > 2sigma(F^2^) is used only for calculating R-factors(gt) etc. and is 
 not relevant to the choice of reflections for refinement.  R-factors based 
 on F^2^ are statistically about twice as large as those based on F, and R- 
 factors based on ALL data will be even larger. 
; 
  
_refine_ls_structure_factor_coef  Fsqd 
_refine_ls_matrix_type            full 
_refine_ls_weighting_scheme       calc 
_refine_ls_weighting_details 
 'calc w=1/[\s^2^(Fo^2^)+(0.2100P)^2^+0.0000P] where P=(Fo^2^+2Fc^2^)/3' 
_atom_sites_solution_primary      direct 
_atom_sites_solution_secondary    difmap 
_atom_sites_solution_hydrogens    geom 
_refine_ls_hydrogen_treatment     constr 
_refine_ls_extinction_method      none 
_refine_ls_extinction_coef        ? 
_refine_ls_number_reflns          3193 
_refine_ls_number_parameters      258 
_refine_ls_number_restraints      0 
_refine_ls_R_factor_all           0.1037 
_refine_ls_R_factor_gt            0.0573 
_refine_ls_wR_factor_ref          0.2632 
_refine_ls_wR_factor_gt           0.1887 
_refine_ls_goodness_of_fit_ref    1.016 
_refine_ls_restrained_S_all       1.016 
_refine_ls_shift/su_max           0.016 
_refine_ls_shift/su_mean          0.001 
  
loop_ 
 _atom_site_label 
 _atom_site_type_symbol 
 _atom_site_fract_x 
 _atom_site_fract_y 
 _atom_site_fract_z 
 _atom_site_U_iso_or_equiv 
 _atom_site_adp_type 
 _atom_site_occupancy 
 _atom_site_symmetry_multiplicity 
 _atom_site_calc_flag 
 _atom_site_refinement_flags 
 _atom_site_disorder_assembly 
 _atom_site_disorder_group 
C1 C 0.23422(12) 0.2399(3) 0.67305(16) 0.0389(7) Uani 1 1 d . . . 
C2 C 0.20731(12) 0.1489(3) 0.70043(16) 0.0362(7) Uani 1 1 d . . . 
H2 H 0.2302 0.0743 0.7363 0.043 Uiso 1 1 calc R . . 
C3 C 0.14589(11) 0.1684(3) 0.67450(15) 0.0333(7) Uani 1 1 d . . . 
C4 C 0.11684(11) 0.0702(3) 0.70347(14) 0.0344(7) Uani 1 1 d . . . 
H4 H 0.1173 -0.0303 0.6905 0.041 Uiso 1 1 calc R . . 
C5 C 0.06122(12) 0.1198(3) 0.70125(16) 0.0370(7) Uani 1 1 d . . . 
H5 H 0.0292 0.0479 0.6871 0.044 Uiso 1 1 calc R . . 
C6 C 0.03774(13) 0.2639(3) 0.66650(17) 0.0413(8) Uani 1 1 d . . . 
H6A H 0.0602 0.3337 0.7108 0.050 Uiso 1 1 calc R . . 
H6B H -0.0060 0.2703 0.6470 0.050 Uiso 1 1 calc R . . 
C7 C 0.04552(12) 0.2972(3) 0.59409(16) 0.0351(7) Uani 1 1 d . . . 
H7 H 0.0348 0.3971 0.5788 0.042 Uiso 1 1 calc R . . 
C8 C 0.11180(12) 0.2765(3) 0.62159(16) 0.0346(7) Uani 1 1 d . . . 
C9 C 0.14033(13) 0.3662(3) 0.59461(17) 0.0379(7) Uani 1 1 d . . . 
H9 H 0.1176 0.4402 0.5580 0.045 Uiso 1 1 calc R . . 
C10 C 0.20068(13) 0.3485(3) 0.62027(17) 0.0411(8) Uani 1 1 d . . . 
H10 H 0.2193 0.4107 0.6018 0.049 Uiso 1 1 calc R . . 
C11 C 0.12152(11) 0.1023(3) 0.78565(16) 0.0336(7) Uani 1 1 d . . . 
C12 C 0.12484(12) -0.0280(3) 0.83023(16) 0.0356(7) Uani 1 1 d . . . 
C13 C 0.17563(13) -0.1446(3) 0.95823(19) 0.0453(8) Uani 1 1 d . . . 
H13A H 0.1388 -0.1566 0.9596 0.068 Uiso 1 1 calc R . . 
H13B H 0.2112 -0.1343 1.0148 0.068 Uiso 1 1 calc R . . 
H13C H 0.1812 -0.2262 0.9324 0.068 Uiso 1 1 calc R . . 
C14 C 0.15670(12) 0.2257(3) 0.83502(17) 0.0373(7) Uani 1 1 d . . . 
H14 H 0.1935 0.2460 0.8376 0.045 Uiso 1 1 calc R . . 
C15 C 0.14181(15) 0.3086(4) 0.8751(2) 0.0556(10) Uani 1 1 d . . . 
H15 H 0.1047 0.2885 0.8715 0.067 Uiso 1 1 calc R . . 
C16 C 0.17681(17) 0.4318(4) 0.9259(2) 0.0597(10) Uani 1 1 d . . . 
H16A H 0.1846 0.4222 0.9816 0.090 Uiso 1 1 calc R . . 
H16B H 0.1530 0.5165 0.9001 0.090 Uiso 1 1 calc R . . 
H16C H 0.2158 0.4376 0.9295 0.090 Uiso 1 1 calc R . . 
C17 C 0.00077(12) 0.2069(3) 0.51785(16) 0.0356(7) Uani 1 1 d . . . 
H17 H 0.0063 0.1078 0.5363 0.043 Uiso 1 1 calc R . . 
C18 C 0.01482(12) 0.2172(3) 0.45109(17) 0.0350(7) Uani 1 1 d . . . 
C19 C 0.01474(15) 0.3589(4) 0.35098(19) 0.0480(8) Uani 1 1 d . . . 
H19A H 0.0576 0.3384 0.3717 0.072 Uiso 1 1 calc R . . 
H19B H 0.0052 0.4542 0.3296 0.072 Uiso 1 1 calc R . . 
H19C H -0.0117 0.2937 0.3065 0.072 Uiso 1 1 calc R . . 
C20 C -0.06525(12) 0.2456(3) 0.48151(16) 0.0374(7) Uani 1 1 d . . . 
H20 H -0.0759 0.3412 0.4707 0.045 Uiso 1 1 calc R . . 
C21 C -0.10890(13) 0.1568(4) 0.46387(18) 0.0423(8) Uani 1 1 d . . . 
H21 H -0.0976 0.0619 0.4769 0.051 Uiso 1 1 calc R . . 
C22 C -0.17518(14) 0.1917(4) 0.4249(2) 0.0512(9) Uani 1 1 d . . . 
H22A H -0.1811 0.2920 0.4146 0.077 Uiso 1 1 calc R . . 
H22B H -0.1882 0.1646 0.4623 0.077 Uiso 1 1 calc R . . 
H22C H -0.1996 0.1414 0.3725 0.077 Uiso 1 1 calc R . . 
C23 C 0.33127(14) 0.1255(4) 0.74945(19) 0.0500(9) Uani 1 1 d . . . 
H23A H 0.3348 0.1391 0.8024 0.075 Uiso 1 1 calc R . . 
H23B H 0.3719 0.1305 0.7580 0.075 Uiso 1 1 calc R . . 
H23C H 0.3132 0.0341 0.7269 0.075 Uiso 1 1 calc R . . 
O1 O 0.29357(9) 0.2305(2) 0.69333(13) 0.0493(6) Uani 1 1 d . . . 
O2 O 0.09311(9) -0.1285(2) 0.79850(12) 0.0438(6) Uani 1 1 d . . . 
O3 O 0.16936(8) -0.0220(2) 0.91100(11) 0.0408(6) Uani 1 1 d . . . 
O4 O 0.03292(9) 0.1213(2) 0.42922(12) 0.0445(6) Uani 1 1 d . . . 
O5 O 0.00448(9) 0.3446(2) 0.41788(12) 0.0431(6) Uani 1 1 d . . . 
  
loop_ 
 _atom_site_aniso_label 
 _atom_site_aniso_U_11 
 _atom_site_aniso_U_22 
 _atom_site_aniso_U_33 
 _atom_site_aniso_U_23 
 _atom_site_aniso_U_13 
 _atom_site_aniso_U_12 
C1 0.0287(14) 0.058(2) 0.0304(14) -0.0019(13) 0.0167(12) -0.0006(13) 
C2 0.0318(14) 0.0473(18) 0.0299(13) 0.0029(12) 0.0168(12) 0.0046(12) 
C3 0.0301(14) 0.0420(18) 0.0282(13) -0.0037(11) 0.0160(12) -0.0020(11) 
C4 0.0290(13) 0.0441(18) 0.0292(13) -0.0007(12) 0.0151(11) -0.0008(11) 
C5 0.0268(14) 0.0540(19) 0.0303(14) -0.0025(12) 0.0156(12) -0.0026(12) 
C6 0.0310(15) 0.058(2) 0.0334(15) -0.0021(13) 0.0161(12) 0.0060(13) 
C7 0.0308(14) 0.0375(17) 0.0334(14) -0.0005(11) 0.0151(12) 0.0049(11) 
C8 0.0305(15) 0.0417(18) 0.0281(13) -0.0036(11) 0.0135(12) -0.0019(11) 
C9 0.0375(15) 0.0379(17) 0.0347(14) 0.0016(12) 0.0171(12) 0.0007(12) 
C10 0.0385(16) 0.0491(19) 0.0366(15) -0.0017(13) 0.0208(14) -0.0058(13) 
C11 0.0262(13) 0.0448(18) 0.0301(13) 0.0005(12) 0.0154(11) -0.0015(12) 
C12 0.0272(13) 0.0498(19) 0.0334(14) -0.0028(12) 0.0187(12) -0.0022(13) 
C13 0.0388(17) 0.051(2) 0.0421(16) 0.0093(13) 0.0193(14) -0.0017(13) 
C14 0.0282(14) 0.0495(19) 0.0335(14) 0.0000(12) 0.0163(12) -0.0034(12) 
C15 0.0509(19) 0.069(2) 0.063(2) -0.0254(18) 0.0410(17) -0.0209(17) 
C16 0.066(2) 0.065(3) 0.0527(19) -0.0167(18) 0.0353(17) -0.0119(18) 
C17 0.0316(14) 0.0408(18) 0.0314(14) 0.0031(11) 0.0150(12) 0.0045(11) 
C18 0.0265(13) 0.0408(19) 0.0329(14) 0.0011(12) 0.0127(12) 0.0013(11) 
C19 0.0473(18) 0.061(2) 0.0427(16) 0.0065(14) 0.0285(15) 0.0057(14) 
C20 0.0327(14) 0.0452(17) 0.0322(14) 0.0019(12) 0.0161(12) 0.0058(12) 
C21 0.0325(15) 0.049(2) 0.0417(16) 0.0018(13) 0.0176(13) 0.0034(13) 
C22 0.0347(16) 0.066(2) 0.0501(18) 0.0016(16) 0.0212(15) 0.0030(15) 
C23 0.0348(16) 0.072(2) 0.0452(17) 0.0055(16) 0.0228(14) 0.0075(15) 
O1 0.0321(11) 0.0680(16) 0.0520(12) 0.0111(11) 0.0256(10) 0.0034(10) 
O2 0.0392(12) 0.0502(15) 0.0416(11) -0.0032(9) 0.0216(10) -0.0099(9) 
O3 0.0362(11) 0.0488(13) 0.0323(10) 0.0028(9) 0.0152(9) -0.0042(9) 
O4 0.0466(12) 0.0464(14) 0.0462(12) 0.0022(10) 0.0288(10) 0.0068(10) 
O5 0.0463(12) 0.0486(14) 0.0391(11) 0.0070(9) 0.0261(10) 0.0101(10) 
  
_geom_special_details 
; 
 All esds (except the esd in the dihedral angle between two l.s. planes) 
 are estimated using the full covariance matrix.  The cell esds are taken 
 into account individually in the estimation of esds in distances, angles 
 and torsion angles; correlations between esds in cell parameters are only 
 used when they are defined by crystal symmetry.  An approximate (isotropic) 
 treatment of cell esds is used for estimating esds involving l.s. planes. 
; 
  
loop_ 
 _geom_bond_atom_site_label_1 
 _geom_bond_atom_site_label_2 
 _geom_bond_distance 
 _geom_bond_site_symmetry_2 
 _geom_bond_publ_flag 
C1 O1 1.376(3) . ? 
C1 C2 1.389(4) . ? 
C1 C10 1.388(4) . ? 
C2 C3 1.405(4) . ? 
C2 H2 0.9500 . ? 
C3 C8 1.388(4) . ? 
C3 C4 1.492(4) . ? 
C4 C5 1.501(4) . ? 
C4 C11 1.548(3) . ? 
C4 H4 1.0000 . ? 
C5 C6 1.516(4) . ? 
C5 C11 1.540(4) . ? 
C5 H5 1.0000 . ? 
C6 C7 1.544(4) . ? 
C6 H6A 0.9900 . ? 
C6 H6B 0.9900 . ? 
C7 C8 1.518(4) . ? 
C7 C17 1.553(4) . ? 
C7 H7 1.0000 . ? 
C8 C9 1.407(4) . ? 
C9 C10 1.378(4) . ? 
C9 H9 0.9500 . ? 
C10 H10 0.9500 . ? 
C11 C14 1.486(4) . ? 
C11 C12 1.494(4) . ? 
C12 O2 1.202(3) . ? 
C12 O3 1.346(3) . ? 
C13 O3 1.442(4) . ? 
C13 H13A 0.9800 . ? 
C13 H13B 0.9800 . ? 
C13 H13C 0.9800 . ? 
C14 C15 1.304(4) . ? 
C14 H14 0.9500 . ? 
C15 C16 1.492(5) . ? 
C15 H15 0.9500 . ? 
C16 H16A 0.9800 . ? 
C16 H16B 0.9800 . ? 
C16 H16C 0.9800 . ? 
C17 C20 1.510(4) . ? 
C17 C18 1.515(4) . ? 
C17 H17 1.0000 . ? 
C18 O4 1.209(3) . ? 
C18 O5 1.340(3) . ? 
C19 O5 1.454(3) . ? 
C19 H19A 0.9800 . ? 
C19 H19B 0.9800 . ? 
C19 H19C 0.9800 . ? 
C20 C21 1.311(4) . ? 
C20 H20 0.9500 . ? 
C21 C22 1.500(4) . ? 
C21 H21 0.9500 . ? 
C22 H22A 0.9800 . ? 
C22 H22B 0.9800 . ? 
C22 H22C 0.9800 . ? 
C23 O1 1.415(4) . ? 
C23 H23A 0.9800 . ? 
C23 H23B 0.9800 . ? 
C23 H23C 0.9800 . ? 
  
loop_ 
 _geom_angle_atom_site_label_1 
 _geom_angle_atom_site_label_2 
 _geom_angle_atom_site_label_3 
 _geom_angle 
 _geom_angle_site_symmetry_1 
 _geom_angle_site_symmetry_3 
 _geom_angle_publ_flag 
O1 C1 C2 124.7(3) . . ? 
O1 C1 C10 115.0(2) . . ? 
C2 C1 C10 120.3(2) . . ? 
C1 C2 C3 119.4(3) . . ? 
C1 C2 H2 120.3 . . ? 
C3 C2 H2 120.3 . . ? 
C8 C3 C2 120.9(2) . . ? 
C8 C3 C4 119.7(2) . . ? 
C2 C3 C4 119.4(2) . . ? 
C3 C4 C5 117.5(3) . . ? 
C3 C4 C11 118.6(2) . . ? 
C5 C4 C11 60.63(16) . . ? 
C3 C4 H4 116.2 . . ? 
C5 C4 H4 116.2 . . ? 
C11 C4 H4 116.2 . . ? 
C4 C5 C6 117.1(2) . . ? 
C4 C5 C11 61.18(16) . . ? 
C6 C5 C11 120.2(2) . . ? 
C4 C5 H5 115.8 . . ? 
C6 C5 H5 115.8 . . ? 
C11 C5 H5 115.8 . . ? 
C5 C6 C7 111.6(2) . . ? 
C5 C6 H6A 109.3 . . ? 
C7 C6 H6A 109.3 . . ? 
C5 C6 H6B 109.3 . . ? 
C7 C6 H6B 109.3 . . ? 
H6A C6 H6B 108.0 . . ? 
C8 C7 C6 109.6(2) . . ? 
C8 C7 C17 112.7(2) . . ? 
C6 C7 C17 109.8(2) . . ? 
C8 C7 H7 108.2 . . ? 
C6 C7 H7 108.2 . . ? 
C17 C7 H7 108.2 . . ? 
C3 C8 C9 118.3(2) . . ? 
C3 C8 C7 120.6(2) . . ? 
C9 C8 C7 121.1(3) . . ? 
C10 C9 C8 121.2(3) . . ? 
C10 C9 H9 119.4 . . ? 
C8 C9 H9 119.4 . . ? 
C9 C10 C1 119.9(3) . . ? 
C9 C10 H10 120.0 . . ? 
C1 C10 H10 120.0 . . ? 
C14 C11 C12 118.6(2) . . ? 
C14 C11 C5 120.7(2) . . ? 
C12 C11 C5 114.0(2) . . ? 
C14 C11 C4 119.5(2) . . ? 
C12 C11 C4 111.5(2) . . ? 
C5 C11 C4 58.19(16) . . ? 
O2 C12 O3 123.1(3) . . ? 
O2 C12 C11 124.9(2) . . ? 
O3 C12 C11 111.9(2) . . ? 
O3 C13 H13A 109.5 . . ? 
O3 C13 H13B 109.5 . . ? 
H13A C13 H13B 109.5 . . ? 
O3 C13 H13C 109.5 . . ? 
H13A C13 H13C 109.5 . . ? 
H13B C13 H13C 109.5 . . ? 
C15 C14 C11 126.1(3) . . ? 
C15 C14 H14 117.0 . . ? 
C11 C14 H14 117.0 . . ? 
C14 C15 C16 127.0(3) . . ? 
C14 C15 H15 116.5 . . ? 
C16 C15 H15 116.5 . . ? 
C15 C16 H16A 109.5 . . ? 
C15 C16 H16B 109.5 . . ? 
H16A C16 H16B 109.5 . . ? 
C15 C16 H16C 109.5 . . ? 
H16A C16 H16C 109.5 . . ? 
H16B C16 H16C 109.5 . . ? 
C20 C17 C18 109.1(2) . . ? 
C20 C17 C7 112.6(2) . . ? 
C18 C17 C7 111.2(2) . . ? 
C20 C17 H17 107.9 . . ? 
C18 C17 H17 107.9 . . ? 
C7 C17 H17 107.9 . . ? 
O4 C18 O5 123.2(2) . . ? 
O4 C18 C17 124.2(3) . . ? 
O5 C18 C17 112.6(2) . . ? 
O5 C19 H19A 109.5 . . ? 
O5 C19 H19B 109.5 . . ? 
H19A C19 H19B 109.5 . . ? 
O5 C19 H19C 109.5 . . ? 
H19A C19 H19C 109.5 . . ? 
H19B C19 H19C 109.5 . . ? 
C21 C20 C17 124.6(3) . . ? 
C21 C20 H20 117.7 . . ? 
C17 C20 H20 117.7 . . ? 
C20 C21 C22 125.7(3) . . ? 
C20 C21 H21 117.1 . . ? 
C22 C21 H21 117.1 . . ? 
C21 C22 H22A 109.5 . . ? 
C21 C22 H22B 109.5 . . ? 
H22A C22 H22B 109.5 . . ? 
C21 C22 H22C 109.5 . . ? 
H22A C22 H22C 109.5 . . ? 
H22B C22 H22C 109.5 . . ? 
O1 C23 H23A 109.5 . . ? 
O1 C23 H23B 109.5 . . ? 
H23A C23 H23B 109.5 . . ? 
O1 C23 H23C 109.5 . . ? 
H23A C23 H23C 109.5 . . ? 
H23B C23 H23C 109.5 . . ? 
C1 O1 C23 118.2(2) . . ? 
C12 O3 C13 115.2(2) . . ? 
C18 O5 C19 115.0(2) . . ? 
  
loop_ 
 _geom_torsion_atom_site_label_1 
 _geom_torsion_atom_site_label_2 
 _geom_torsion_atom_site_label_3 
 _geom_torsion_atom_site_label_4 
 _geom_torsion 
 _geom_torsion_site_symmetry_1 
 _geom_torsion_site_symmetry_2 
 _geom_torsion_site_symmetry_3 
 _geom_torsion_site_symmetry_4 
 _geom_torsion_publ_flag 
O1 C1 C2 C3 -179.2(2) . . . . ? 
C10 C1 C2 C3 -0.3(4) . . . . ? 
C1 C2 C3 C8 0.4(4) . . . . ? 
C1 C2 C3 C4 179.6(2) . . . . ? 
C8 C3 C4 C5 -22.4(4) . . . . ? 
C2 C3 C4 C5 158.4(2) . . . . ? 
C8 C3 C4 C11 -92.1(3) . . . . ? 
C2 C3 C4 C11 88.6(3) . . . . ? 
C3 C4 C5 C6 2.3(3) . . . . ? 
C11 C4 C5 C6 111.3(3) . . . . ? 
C3 C4 C5 C11 -109.0(3) . . . . ? 
C4 C5 C6 C7 36.0(3) . . . . ? 
C11 C5 C6 C7 106.8(3) . . . . ? 
C5 C6 C7 C8 -54.5(3) . . . . ? 
C5 C6 C7 C17 69.8(3) . . . . ? 
C2 C3 C8 C9 -0.1(4) . . . . ? 
C4 C3 C8 C9 -179.2(2) . . . . ? 
C2 C3 C8 C7 -179.8(2) . . . . ? 
C4 C3 C8 C7 1.0(4) . . . . ? 
C6 C7 C8 C3 37.5(3) . . . . ? 
C17 C7 C8 C3 -85.1(3) . . . . ? 
C6 C7 C8 C9 -142.2(3) . . . . ? 
C17 C7 C8 C9 95.2(3) . . . . ? 
C3 C8 C9 C10 -0.5(4) . . . . ? 
C7 C8 C9 C10 179.2(2) . . . . ? 
C8 C9 C10 C1 0.6(4) . . . . ? 
O1 C1 C10 C9 178.8(3) . . . . ? 
C2 C1 C10 C9 -0.2(4) . . . . ? 
C4 C5 C11 C14 107.8(3) . . . . ? 
C6 C5 C11 C14 1.4(3) . . . . ? 
C4 C5 C11 C12 -101.3(3) . . . . ? 
C6 C5 C11 C12 152.3(2) . . . . ? 
C6 C5 C11 C4 -106.4(3) . . . . ? 
C3 C4 C11 C14 -2.5(3) . . . . ? 
C5 C4 C11 C14 -109.8(3) . . . . ? 
C3 C4 C11 C12 -147.0(2) . . . . ? 
C5 C4 C11 C12 105.7(3) . . . . ? 
C3 C4 C11 C5 107.3(3) . . . . ? 
C14 C11 C12 O2 170.4(2) . . . . ? 
C5 C11 C12 O2 18.8(4) . . . . ? 
C4 C11 C12 O2 -44.8(3) . . . . ? 
C14 C11 C12 O3 -11.5(3) . . . . ? 
C5 C11 C12 O3 -163.0(2) . . . . ? 
C4 C11 C12 O3 133.4(2) . . . . ? 
C12 C11 C14 C15 -76.7(4) . . . . ? 
C5 C11 C14 C15 72.9(4) . . . . ? 
C4 C11 C14 C15 141.3(3) . . . . ? 
C11 C14 C15 C16 179.1(3) . . . . ? 
C8 C7 C17 C20 -169.9(2) . . . . ? 
C6 C7 C17 C20 67.5(3) . . . . ? 
C8 C7 C17 C18 -47.2(3) . . . . ? 
C6 C7 C17 C18 -169.7(2) . . . . ? 
C20 C17 C18 O4 -121.0(3) . . . . ? 
C7 C17 C18 O4 114.2(3) . . . . ? 
C20 C17 C18 O5 58.4(3) . . . . ? 
C7 C17 C18 O5 -66.3(3) . . . . ? 
C18 C17 C20 C21 105.6(3) . . . . ? 
C7 C17 C20 C21 -130.5(3) . . . . ? 
C17 C20 C21 C22 -177.6(3) . . . . ? 
C2 C1 O1 C23 -3.5(4) . . . . ? 
C10 C1 O1 C23 177.6(2) . . . . ? 
O2 C12 O3 C13 -1.5(4) . . . . ? 
C11 C12 O3 C13 -179.7(2) . . . . ? 
O4 C18 O5 C19 1.9(4) . . . . ? 
C17 C18 O5 C19 -177.5(2) . . . . ? 
  
_diffrn_measured_fraction_theta_max    0.906 
_diffrn_reflns_theta_full              65.90 
_diffrn_measured_fraction_theta_full   0.906 
_refine_diff_density_max    0.455 
_refine_diff_density_min   -0.540 
_refine_diff_density_rms    0.101 
